# Supplementary material for: Comparative Transcriptome Analyses of Leg Muscle during Early Growth between Geese (Anser cygnoides) Breeds Differing in Body Size Characteristics
Source: MDPI journal article supplement (doi:10.3390/genes14051048), 2023-05-07
Supplement: s1 [file s1]

Table S2. Results of the estimates for the three nonlinear models

| Items               | Goose           | Model       | A        | B      | K     | R <sup>2*</sup> | WGI <sup>a</sup> | BGI <sup>b</sup> |
|---------------------|-----------------|-------------|----------|--------|-------|-----------------|------------------|------------------|
| Body weight,<br>g   | Shitou<br>goose | Logistic    | 5290.870 | 37.334 | 0.608 | 0.999           | 5.954            | 2645.435         |
|                     |                 | Bertalanffy | 6252.152 | 1.115  | 0.258 | 0.995           | 4.680            | 1852.489         |
|                     |                 | Gompertz    | 5813.700 | 5.935  | 0.346 | 0.998           | 5.147            | 2138.741         |
|                     | Wuzong<br>goose | Logistic    | 2692.975 | 23.443 | 0.638 | 0.998           | 4.944            | 1346.488         |
|                     |                 | Bertalanffy | 2984.940 | 0.983  | 0.303 | 0.995           | 3.569            | 884.427          |
|                     |                 | Gompertz    | 2866.950 | 4.746  | 0.382 | 0.997           | 4.077            | 1054.692         |
| Body length,<br>cm  | Shitou<br>goose | Logistic    | 41.720   | 4.421  | 0.344 | 0.995           | 4.321            | 20.860           |
|                     |                 | Bertalanffy | 50.563   | 0.485  | 0.153 | 0.991           | 2.451            | 14.982           |
|                     |                 | Gompertz    | 46.813   | 1.886  | 0.201 | 0.992           | 3.157            | 17.222           |
|                     | Wuzong<br>goose | Logistic    | 30.580   | 3.182  | 0.376 | 0.987           | 3.078            | 15.290           |
|                     |                 | Bertalanffy | 33.649   | 0.420  | 0.204 | 0.989           | 1.133            | 9.970            |
|                     |                 | Gompertz    | 32.483   | 1.568  | 0.247 | 0.989           | 1.821            | 11.950           |
| Chest deep,<br>cm   | Shitou<br>goose | Logistic    | 13.486   | 3.724  | 0.369 | 0.987           | 3.563            | 6.743            |
|                     |                 | Bertalanffy | 15.305   | 0.445  | 0.184 | 0.978           | 1.570            | 4.535            |
|                     |                 | Gompertz    | 14.570   | 1.697  | 0.230 | 0.981           | 2.299            | 5.360            |
|                     | Wuzong<br>goose | Logistic    | 10.982   | 3.041  | 0.365 | 0.998           | 3.047            | 5.491            |
|                     |                 | Bertalanffy | 12.089   | 0.409  | 0.198 | 0.995           | 1.033            | 3.582            |
|                     |                 | Gompertz    | 11.666   | 1.520  | 0.240 | 0.996           | 1.745            | 4.292            |
| Chest width,<br>cm  | Shitou<br>goose | Logistic    | 16.465   | 5.411  | 0.350 | 0.995           | 4.824            | 8.233            |
|                     |                 | Bertalanffy | 20.946   | 0.523  | 0.143 | 0.986           | 3.150            | 6.206            |
|                     |                 | Gompertz    | 18.921   | 2.090  | 0.195 | 0.989           | 3.780            | 6.961            |
|                     | Wuzong<br>goose | Logistic    | 11.972   | 3.966  | 0.388 | 0.996           | 3.551            | 5.986            |
|                     |                 | Bertalanffy | 13.421   | 0.457  | 0.197 | 0.990           | 1.602            | 3.977            |
|                     |                 | Gompertz    | 12.844   | 1.758  | 0.244 | 0.992           | 2.312            | 4.725            |
| Pelvis width,<br>cm | Shitou<br>goose | Logistic    | 11.298   | 3.569  | 0.409 | 0.980           | 3.111            | 5.649            |
|                     |                 | Bertalanffy | 12.439   | 0.428  | 0.213 | 0.965           | 1.174            | 3.686            |
|                     |                 | Gompertz    | 11.994   | 1.629  | 0.261 | 0.969           | 1.870            | 4.412            |
|                     | Wuzong<br>goose | Logistic    | 8.580    | 2.603  | 0.445 | 0.987           | 2.150            | 4.290            |
|                     |                 | Bertalanffy | 8.998    | 0.372  | 0.270 | 0.980           | 0.406            | 2.666            |
|                     |                 | Gompertz    | 8.850    | 1.362  | 0.313 | 0.982           | 0.987            | 3.256            |
| Keel length,<br>cm  | Shitou<br>goose | Logistic    | 21.676   | 6.438  | 0.329 | 0.993           | 5.660            | 10.838           |
|                     |                 | Bertalanffy | 30.941   | 0.566  | 0.116 | 0.987           | 4.564            | 9.168            |
|                     |                 | Gompertz    | 26.462   | 2.306  | 0.169 | 0.989           | 4.944            | 9.735            |
|                     | Wuzong<br>goose | Logistic    | 15.762   | 4.691  | 0.349 | 0.994           | 4.429            | 7.881            |
|                     |                 | Bertalanffy | 18.558   | 0.501  | 0.165 | 0.995           | 2.469            | 5.499            |
|                     |                 | Gompertz    | 17.397   | 1.962  | 0.211 | 0.995           | 3.194            | 6.400            |
| Tibia length,<br>cm | Shitou<br>goose | Logistic    | 10.385   | 2.387  | 0.451 | 0.992           | 1.929            | 5.193            |
|                     |                 | Bertalanffy | 10.836   | 0.354  | 0.278 | 0.982           | 0.216            | 3.211            |
|                     |                 | Gompertz    | 10.677   | 1.286  | 0.321 | 0.985           | 0.784            | 3.928            |
|                     | Wuzong          | Logistic    | 8.499    | 1.891  | 0.504 | 0.997           | 1.264            | 4.250            |

|                                    |                 |             |        |       |       |       |        |        |
|------------------------------------|-----------------|-------------|--------|-------|-------|-------|--------|--------|
|                                    | goose           | Bertalanffy | 8.700  | 0.314 | 0.339 | 0.991 | -0.176 | 2.578  |
|                                    |                 | Gompertz    | 8.633  | 1.110 | 0.380 | 0.993 | 0.275  | 3.176  |
| Shank<br>circumference,<br>cm      | Shitou<br>goose | Logistic    | 5.835  | 1.982 | 0.420 | 0.994 | 1.629  | 2.918  |
|                                    |                 | Bertalanffy | 6.079  | 0.323 | 0.266 | 0.987 | -0.118 | 1.801  |
|                                    |                 | Gompertz    | 5.995  | 1.149 | 0.304 | 0.990 | 0.457  | 2.205  |
|                                    | Wuzong<br>goose | Logistic    | 4.405  | 1.529 | 0.554 | 0.996 | 0.766  | 2.203  |
|                                    |                 | Bertalanffy | 4.474  | 0.278 | 0.393 | 0.996 | -0.462 | 1.326  |
|                                    |                 | Gompertz    | 4.452  | 0.965 | 0.432 | 0.996 | -0.082 | 1.638  |
| Semi-<br>submersible<br>length, cm | Shitou<br>goose | Logistic    | 80.536 | 4.030 | 0.348 | 0.998 | 4.005  | 40.268 |
|                                    |                 | Bertalanffy | 94.427 | 0.466 | 0.165 | 0.994 | 2.031  | 27.978 |
|                                    |                 | Gompertz    | 88.696 | 1.791 | 0.211 | 0.996 | 2.762  | 32.629 |
|                                    | Wuzong<br>goose | Logistic    | 61.177 | 3.128 | 0.391 | 0.997 | 2.917  | 30.589 |
|                                    |                 | Bertalanffy | 66.381 | 0.413 | 0.217 | 0.995 | 0.988  | 19.668 |
|                                    |                 | Gompertz    | 64.419 | 1.543 | 0.261 | 0.996 | 1.662  | 23.698 |
| Neck length,<br>cm                 | Shitou<br>goose | Logistic    | 28.192 | 3.455 | 0.369 | 0.996 | 3.360  | 14.096 |
|                                    |                 | Bertalanffy | 31.365 | 0.436 | 0.195 | 0.995 | 1.377  | 9.293  |
|                                    |                 | Gompertz    | 30.112 | 1.645 | 0.239 | 0.996 | 2.083  | 11.078 |
|                                    | Wuzong<br>goose | Logistic    | 21.191 | 2.891 | 0.429 | 0.996 | 2.475  | 10.596 |
|                                    |                 | Bertalanffy | 22.512 | 0.397 | 0.251 | 0.995 | 0.696  | 6.670  |
|                                    |                 | Gompertz    | 22.029 | 1.470 | 0.295 | 0.996 | 1.306  | 8.104  |

\*R<sup>2</sup> represents the goodness of fit.

<sup>a</sup>WGI indicates the weeks of age at the inflexion point of growth.

<sup>b</sup>BGI indicates the value at the inflexion point of growth.
