# Supplementary material for: Comparative Transcriptome Analyses of Leg Muscle during Early Growth between Geese (Anser cygnoides) Breeds Differing in Body Size Characteristics
Source: MDPI journal article supplement (doi:10.3390/genes14051048), 2023-05-07
Supplement: s1 [file s1]

Table S1 The primers for qPCR validation

| Accession NO.  | Gene symbol  | Primer sequence                                     | Annealing temperature | Product size |
|----------------|--------------|-----------------------------------------------------|-----------------------|--------------|
| XM_013180350.1 | EIF4E3       | F: CAACGCCAAGGGAGGTAT<br>R: TCACGAACGCTGACGCTA      | 50°C                  | 153 bp       |
| XM_013172551.1 | LOC106030656 | R: CACATTCCACCACCAACT<br>F: GCCCAATGTA ACTATCAG     | 49°C                  | 192 bp       |
| XM_013186777.1 | MAP3K4       | R: TCTTTGCCATCCCAC TTC<br>F: ATTCCCCACCTTGCTGTGAG   | 55°C                  | 107 bp       |
| XM_013201113.1 | MYLK4        | R: GACTCGGCAAAGGACCAAGA<br>F: AAGGAGCTGGACATGGTT    | 44°C                  | 157 bp       |
| XM_013196238.1 | NDUFA7       | R: TCTGTTGAATCTGGAGGT<br>F: CCAGCCCTATTTGTGAGA      | 46.7°C                | 119 bp       |
| XM_013172615.1 | ODC1         | R: AAGTTCCATACAGCAGCATT<br>F: ACGTTAGGTGCAGTCAGA    | 59°C                  | 106 bp       |
| XM_013202142.1 | SLC2A1       | R: CACAGAAGGACTTGGGTA<br>F: TTGGGTTTGTGGCGTTCT      | 59°C                  | 112 bp       |
| XM_013183629.1 | SLC25A5      | R: GACAGCCCAGCAACAGCA<br>F: GACCCAAAGAACACCCAC      | 65°C                  | 100 bp       |
| XM_013191136.1 | SSTR4        | R: GACGACGAACTGTATCAAAA<br>F: TGTTTGTGGTCTGCTGGATG  | 59°C                  | 100 bp       |
| XM_013195871.1 | CXCL12       | R: AGGATGAGGGAGGCGTTG<br>F: TTACCGATGTCCCTGTC       | 44°C                  | 207 bp       |
| XM_013198276.1 | ANKRD9       | R: TTATGAGTGCGATGACG<br>F: CGCTGGCAGGACCTCTTAG      | 49.7°C                | 117 bp       |
| MG674174       | GAPDH        | R: GAAGTGCTCGGGAGAAATGG<br>F: TCTGTCGTGGACCTGACCTGC | 56°C                  | 180bp        |
|                |              | R: GCCAGCACCCGCATCAAA                               |                       |              |
